# Supplementary material
Source: MDPI journal article supplement (https://www.mdpi.com/1424-2818/16/2/76)
Supplement: s1 [file s1]

## Supporting Information

**Table S1 Location of the respondent**

|               | Province/Nationality  | Count |
|---------------|-----------------------|-------|
| Within China  | Anhui                 | 21    |
|               | Beijing               | 79    |
|               | Fujian                | 36    |
|               | Gansu                 | 65    |
|               | Guangdong             | 82    |
|               | Guangxi               | 13    |
|               | Guizhou               | 17    |
|               | Hainan                | 2     |
|               | Hebei                 | 149   |
|               | Henan                 | 131   |
|               | Heilongjiang          | 14    |
|               | Hubei                 | 11    |
|               | Hunan                 | 10    |
|               | Jilin                 | 11    |
|               | Jiangsu               | 45    |
|               | Jiangxi               | 6     |
|               | Liaoning              | 50    |
|               | Inner Mongolia        | 20    |
|               | Qinghai               | 3     |
|               | Shandong              | 154   |
|               | Shanxi                | 12    |
|               | Shaanxi               | 10    |
|               | Shanghai              | 29    |
|               | Sichuan               | 730   |
|               | Tianjin               | 11    |
|               | Hong Kong             | 1     |
|               | Xinjiang              | 5     |
|               | Yunnan                | 46    |
|               | Zhejiang              | 37    |
|               | Chongqing             | 34    |
| Outside China | Argentina             | 10    |
|               | Australia             | 53    |
|               | Botswana              | 1     |
|               | British Virgin Island | 1     |
|               | Canada                | 24    |
|               | China                 | 6     |
|               | Denmark               | 1     |
|               | France                | 4     |
|               | India                 | 3     |
|               | Indonesia             | 3     |

|                                                      |    |
|------------------------------------------------------|----|
| Italy                                                | 2  |
| Japan                                                | 14 |
| Latvia                                               | 1  |
| Malaysia                                             | 26 |
| New Zealand                                          | 1  |
| Norway                                               | 1  |
| Pakistan                                             | 7  |
| Peru                                                 | 2  |
| Philippines                                          | 3  |
| Singapore                                            | 48 |
| South Africa                                         | 3  |
| Spain                                                | 2  |
| Switzerland                                          | 1  |
| Thailand                                             | 1  |
| United Kingdom of Great Britain and Northern Ireland | 22 |
| United States of America                             | 8  |
| Vietnam                                              | 23 |

---

**Table S2.** The count of potential beneficiary species for the giant panda and snow leopard under various combinations of P1 and P2 threshold levels.

| P1   | P2   | Count of potential beneficiary species |              |                             |    | Additional species benefited from snow leopard | Habitat covered more by snow leopard |
|------|------|----------------------------------------|--------------|-----------------------------|----|------------------------------------------------|--------------------------------------|
|      |      | Giant Panda                            | Snow leopard | Benefited from both species |    |                                                |                                      |
| 0.01 | 0.01 | 700                                    | 437          | 356                         | 81 | 284                                            |                                      |
| 0.01 | 0.05 | 697                                    | 424          | 347                         | 77 | 283                                            |                                      |
| 0.01 | 0.1  | 693                                    | 419          | 340                         | 79 | 281                                            |                                      |
| 0.01 | 0.2  | 690                                    | 415          | 337                         | 78 | 279                                            |                                      |
| 0.05 | 0.01 | 644                                    | 403          | 321                         | 82 | 268                                            |                                      |
| 0.05 | 0.05 | 633                                    | 364          | 294                         | 70 | 262                                            |                                      |
| 0.05 | 0.1  | 624                                    | 353          | 284                         | 69 | 258                                            |                                      |
| 0.05 | 0.2  | 619                                    | 342          | 277                         | 65 | 254                                            |                                      |
| 0.1  | 0.01 | 614                                    | 394          | 309                         | 85 | 259                                            |                                      |
| 0.1  | 0.05 | 596                                    | 338          | 272                         | 66 | 248                                            |                                      |
| 0.1  | 0.1  | 586                                    | 317          | 254                         | 63 | 241                                            |                                      |
| 0.1  | 0.2  | 577                                    | 293          | 234                         | 59 | 229                                            |                                      |
| 0.2  | 0.01 | 558                                    | 385          | 289                         | 96 | 240                                            |                                      |
| 0.2  | 0.05 | 523                                    | 301          | 231                         | 70 | 208                                            |                                      |
| 0.2  | 0.1  | 510                                    | 273          | 209                         | 64 | 198                                            |                                      |
| 0.2  | 0.2  | 495                                    | 239          | 183                         | 56 | 180                                            |                                      |
